# Supplementary material
Source: MDPI journal article supplement (https://www.mdpi.com/1424-2818/14/5/308)

**Supplementary Table S1.** H<sub>2</sub>O<sub>2</sub> volume in mL employed to digest the samples analysed in this study. GIT, gastrointestinal tract. More volume was employed when hard tissue was present.

| <b>Sample</b> | <b>Tissue</b>  | <b>H<sub>2</sub>O<sub>2</sub> volume (mL)</b> |
|---------------|----------------|-----------------------------------------------|
| H1.0          | GIT            | 200                                           |
| H1.0          | Liver          | 200                                           |
| H1.0          | Gills          | 200                                           |
| H1.1          | Whole organism | 600                                           |
| H2.0          | GIT            | 200                                           |
| H2.0          | Liver          | 200                                           |
| H2.0          | Gills          | 200                                           |
| H3.0          | GIT            | 300                                           |
| H3.0          | Liver          | 330                                           |
| H3.0          | Gills          | 200                                           |
| H3.1          | Whole organism | 550                                           |
| H3.1.1        | Whole organism | 200                                           |

**Supplementary Table S2.** Number and type of microplastics found in each sample analysed. GIT, gastrointestinal tract.

| SAMPLE     | FIBERS |                   |     |                        |       | FRAGMENTS |       |                   |      |      |       |
|------------|--------|-------------------|-----|------------------------|-------|-----------|-------|-------------------|------|------|-------|
|            | Black  | Blue/<br>greenish | Red | Transparent<br>/ White | Brown | Black     | Green | Brown /<br>Yellow | Grey | Blue | White |
| H1 GIT     | 10     | 12                | 3   | 0                      | 0     | 1         | 0     | 0                 | 0    | 0    | 0     |
| H1 Liver   | 4      | 2                 | 0   | 0                      | 0     | 0         | 1     | 0                 | 0    | 0    | 0     |
| H1 Gills   | 5      | 6                 | 2   | 1                      | 0     | 1         | 0     | 0                 | 0    | 0    | 0     |
| Prey 1.1   | 35     | 31                | 4   | 7                      | 0     | 4         | 0     | 3                 | 1    | 0    | 0     |
| H2 GIT     | 8      | 5                 | 1   | 1                      | 0     | 0         | 0     | 0                 | 0    | 0    | 0     |
| H2 Liver   | 7      | 9                 | 3   | 3                      | 0     | 1         | 0     | 0                 | 0    | 0    | 0     |
| H2 Gills   | 4      | 3                 | 2   | 4                      | 0     | 0         | 0     | 0                 | 0    | 1    | 1     |
| H3 GIT     | 4      | 2                 | 1   | 1                      | 0     | 0         | 0     | 0                 | 0    | 0    | 0     |
| H3 Liver   | 7      | 6                 | 1   | 5                      | 0     | 0         | 0     | 0                 | 0    | 0    | 0     |
| H3 Gills   | 2      | 6                 | 0   | 1                      | 0     | 0         | 0     | 0                 | 0    | 0    | 0     |
| Prey 3.1   | 5      | 4                 | 0   | 0                      | 0     | 0         | 1     | 1                 | 1    | 0    | 0     |
| Prey 3.1.1 | 0      | 1                 | 1   | 0                      | 0     | 2         | 0     | 0                 | 0    | 0    | 0     |
| Water      | 4      | 6                 | 1   | 1                      | 1     | 2         | 1     | 0                 | 0    | 1    | 0     |

**Supplementary Figure S1.** Clean spectra obtained from some dangerous polymer identified by  $\mu$ -FT-IR (Table 2), with no evidence of mixture of compounds. In different colours the sample analysed, in black the reference pattern. (A) Acrylic, (B) Polyester and (C) Tetrahydrophthalimide.

A)

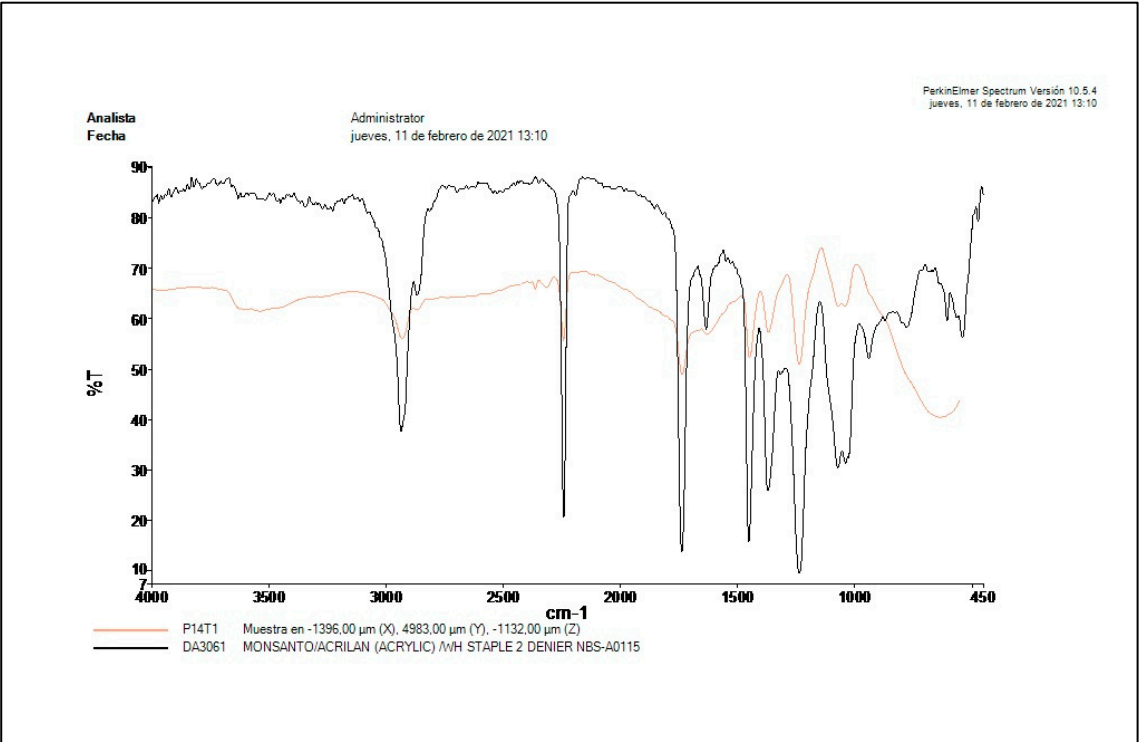

B)

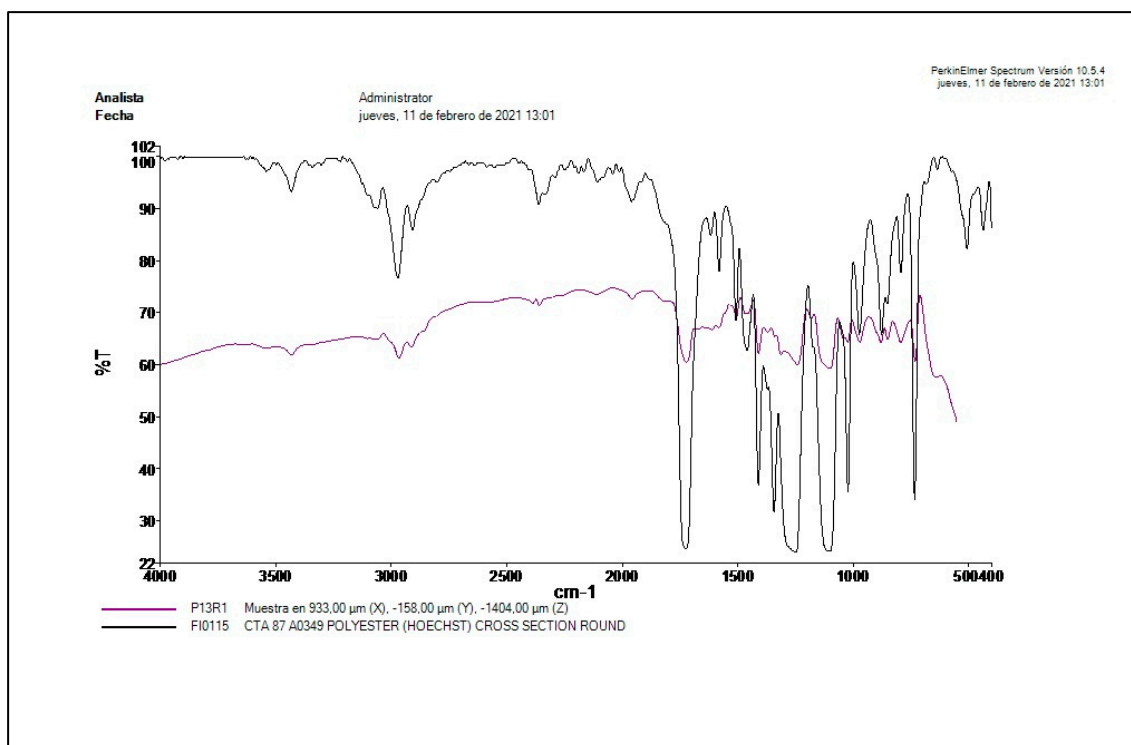

C)

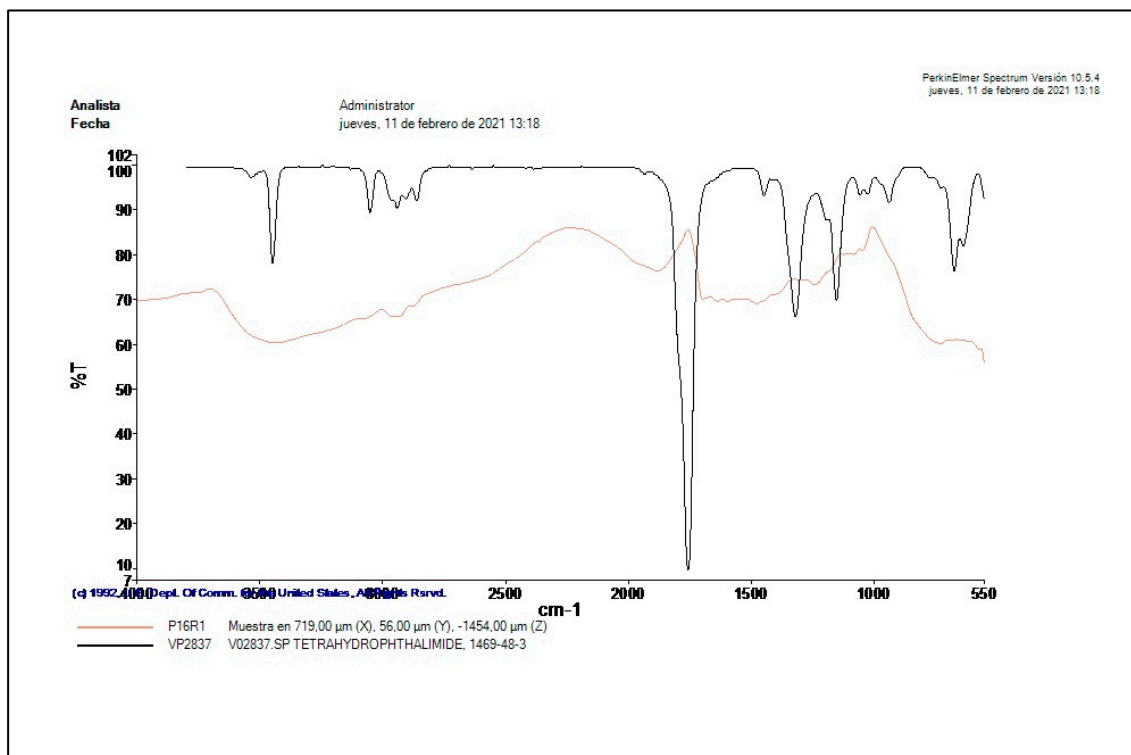

Supplement: s1 [file s1]
